# Supplementary material
Source: PubMed Central journal article supplement (PMC3359918)
Supplement: supp_mcs059_mcs059supp.pdf [file supp_mcs059_mcs059supp.pdf]

## SUPPLEMENTARY DATA

FIG. S1. Soluble carbohydrate (glucose, fructose, sucrose and trehalose) content of (A) above-ground and (B) below-ground tissues of *Rorippa amphibia*, *R. sylvestris* and their hybrid in air controls and submerged plants after 7, 14 and 20 d of treatment ( $n = 6$ ; error bars indicate s.e.).

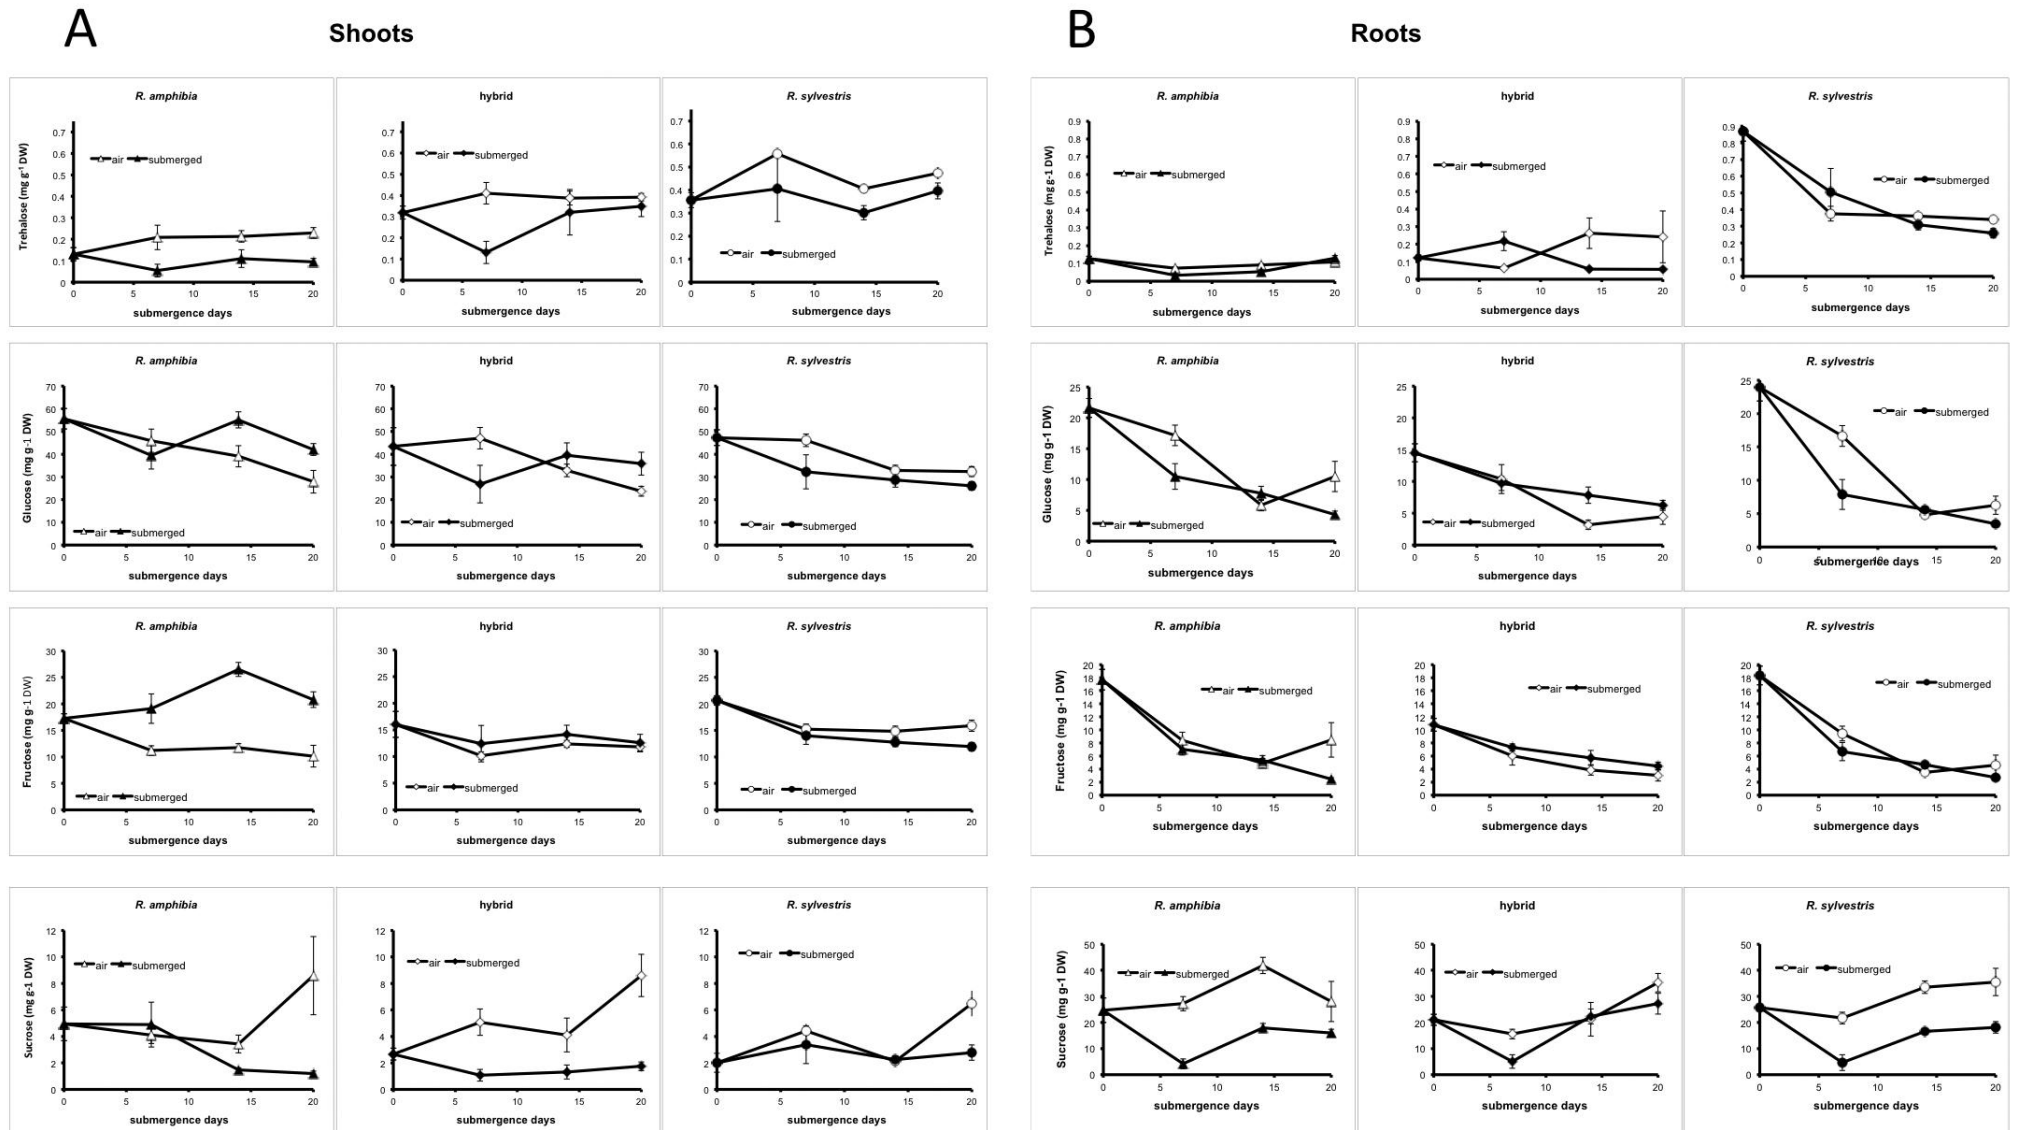

FIG. S2. Soluble carbohydrate (glucose, fructose, sucrose and trehalose) content of (A) above-ground and (B) below-ground tissues at the start and after 37 d of complete submergence followed by controlled air contact for 21 and 42 d for *Rorippa amphibia*, *R. sylvestris* and their hybrid ( $n = 9$ ).

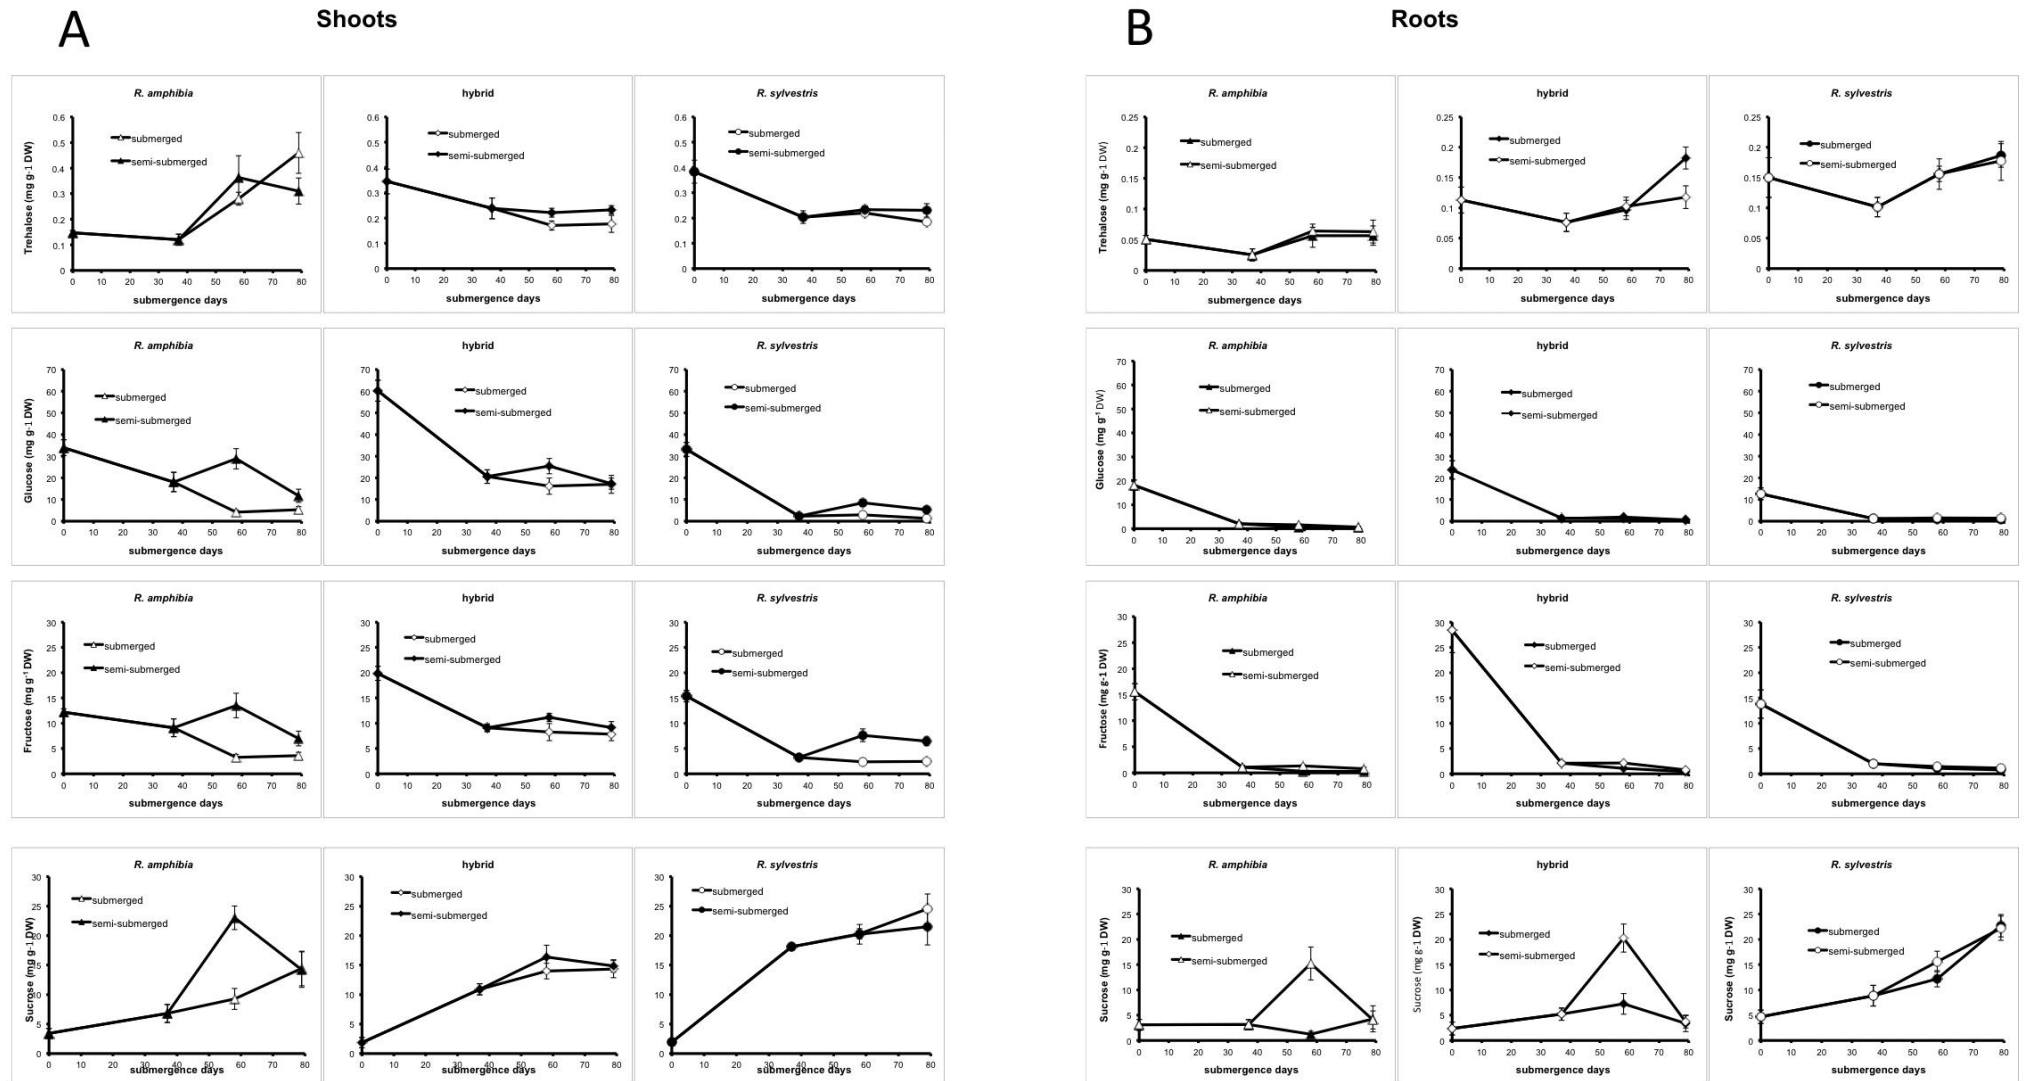

FIG. S3. Correlation of *ADH1* and *SUS1* expression in *Rorippa amphibia*, *R. sylvestris* and the hybrid roots after 3 d of complete submergence followed by 2, 26 and 74 h of complete and semi-submergence.

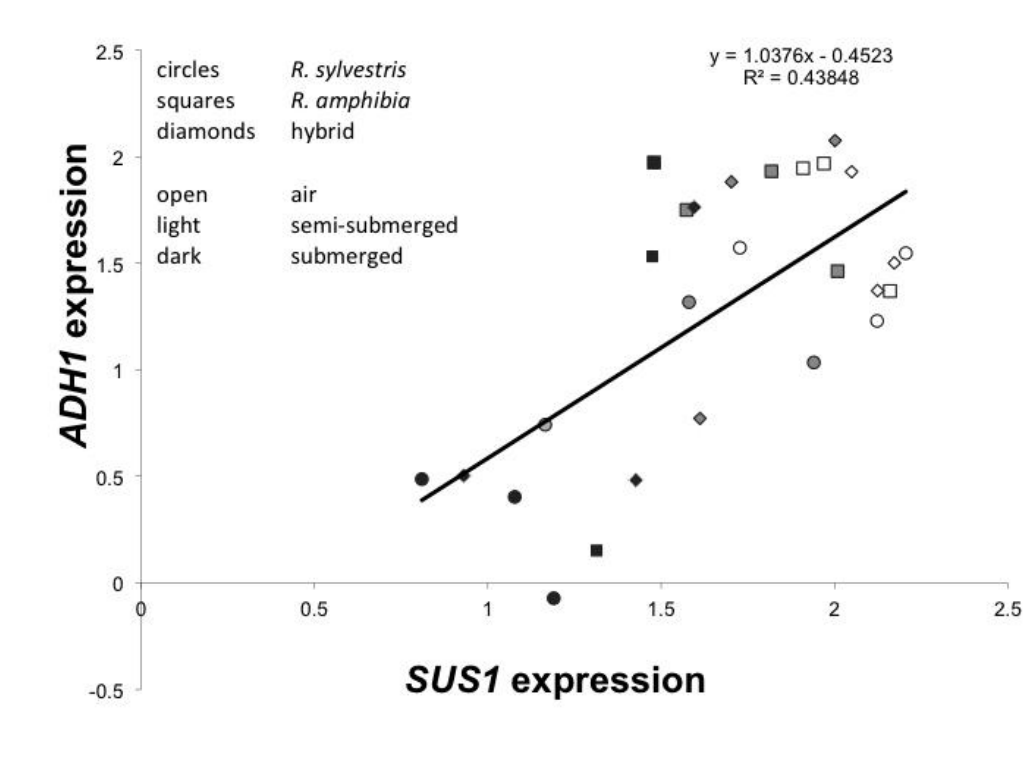

FIG. S4. Dilution and melting curves calculated from RT-qPCR for *ADH1* and *SUS1*.

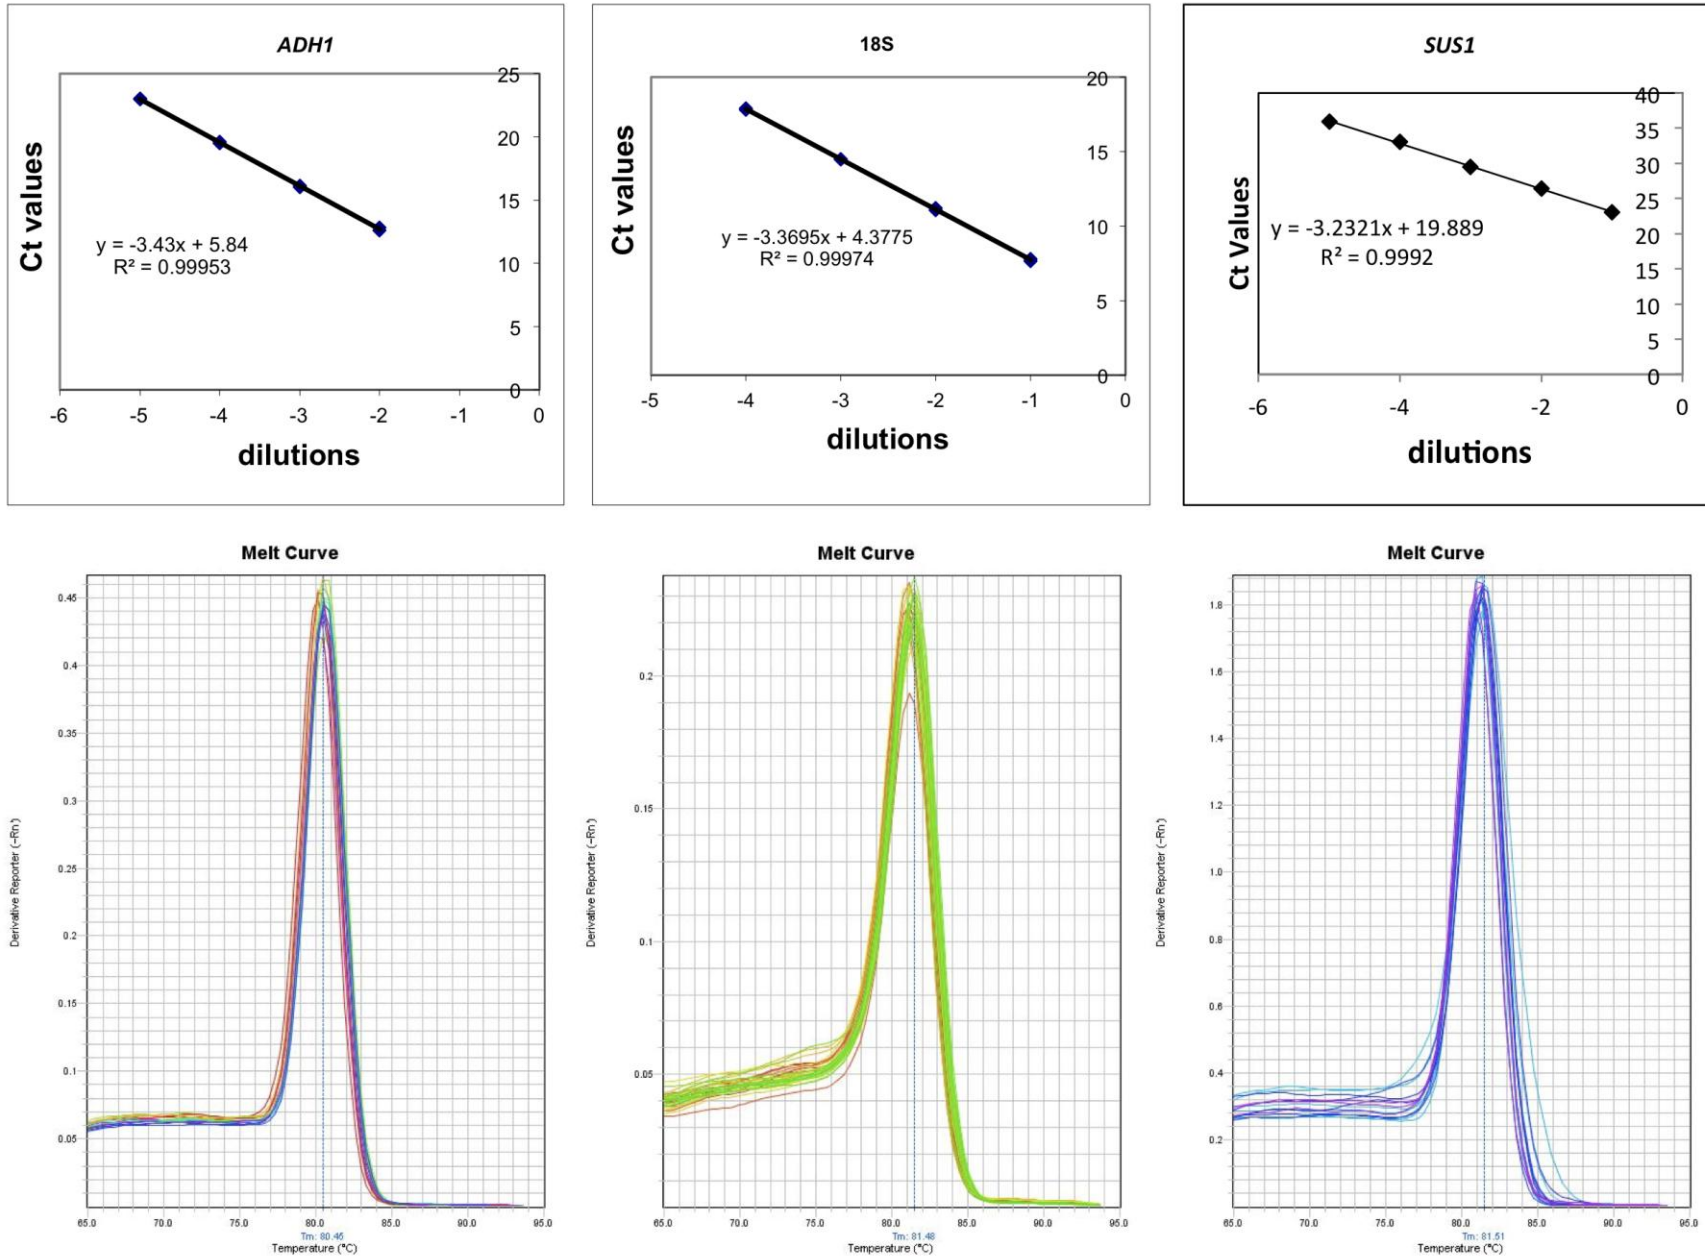

FIG. S5. Leaf scans of the second youngest leaves and pictures of adult *Rorippa amphibia*, *R. sylvestris* and the hybrid plants.

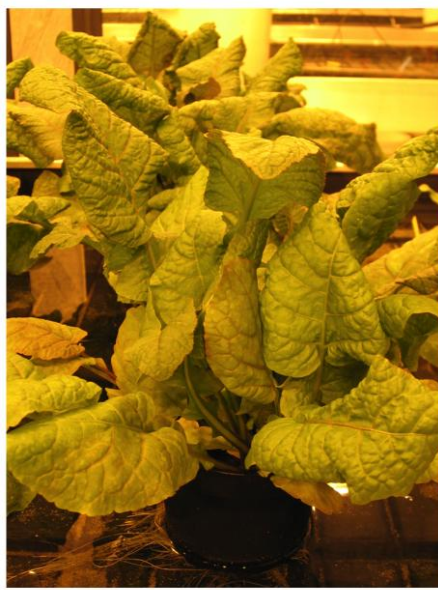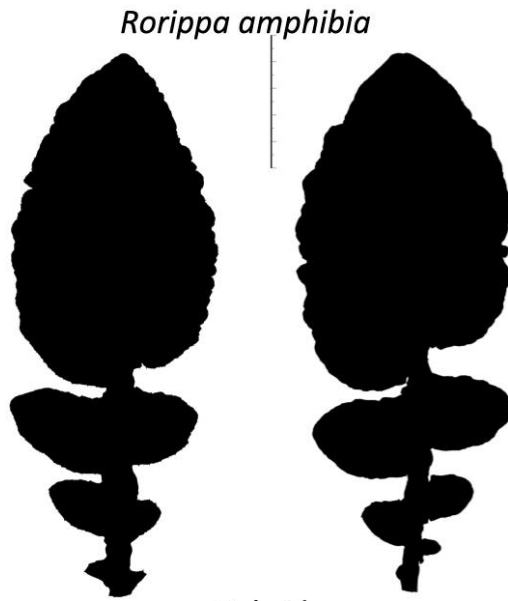

Hybrid

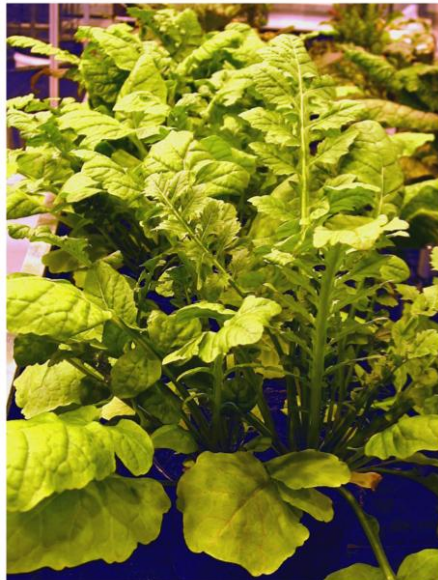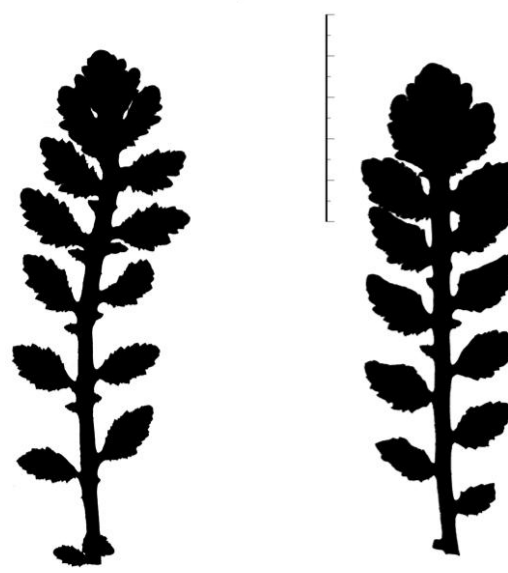

*Rorippa sylvestris*

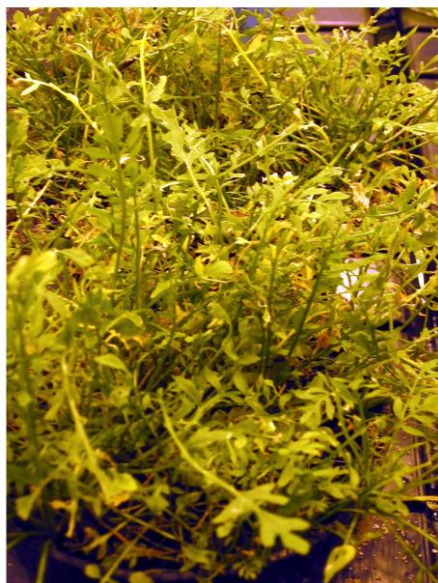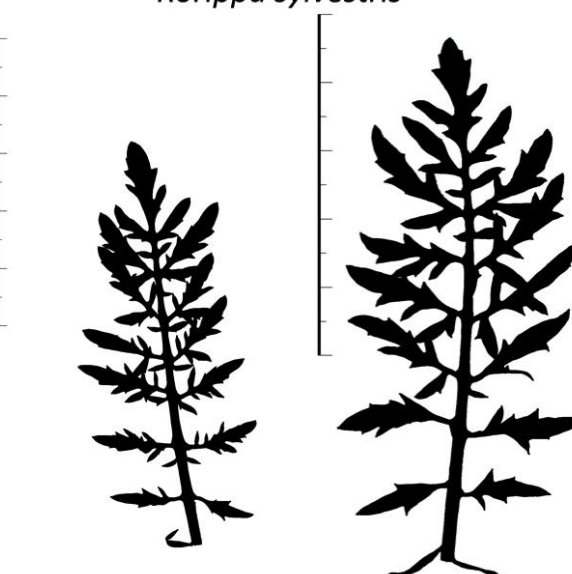



FIG. S6. *ADH* gene alignments for *Arabidopsis thaliana* and *Rorippa*.

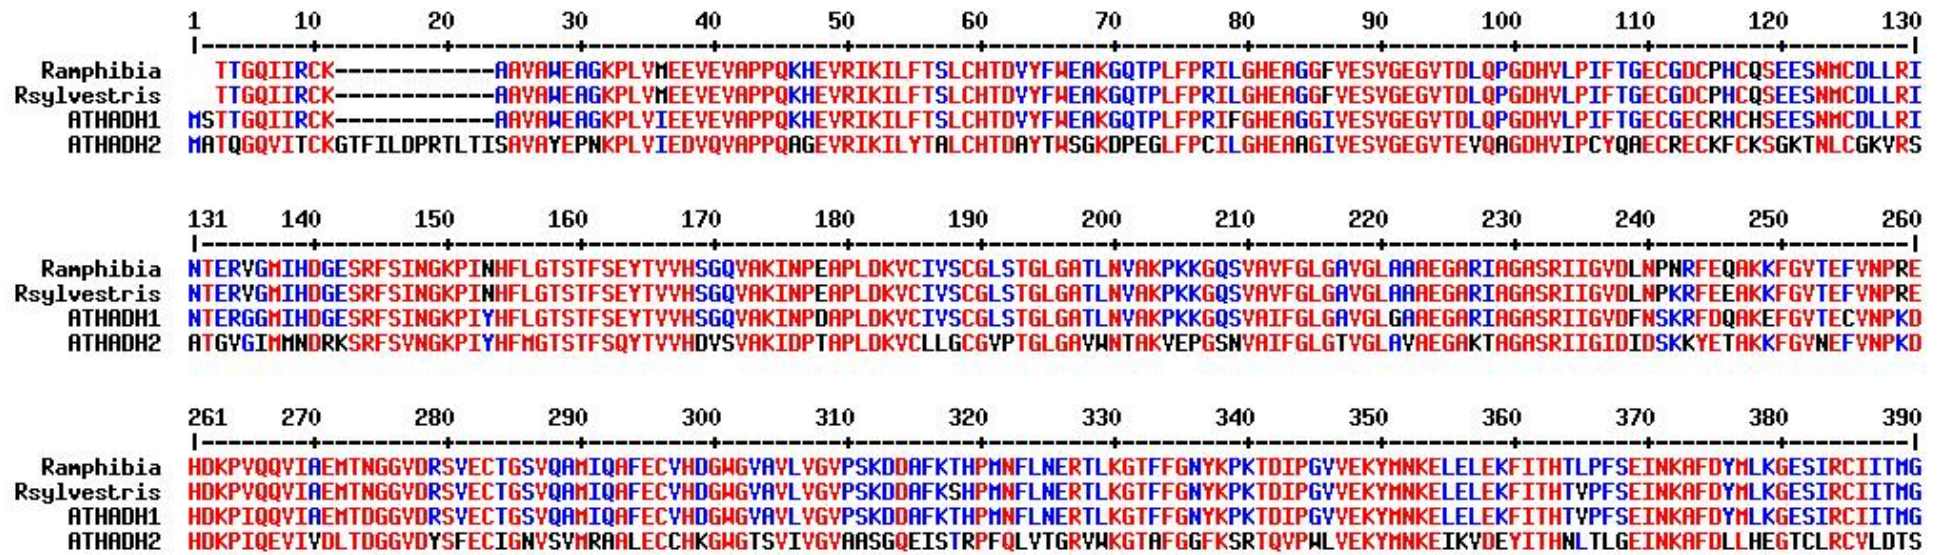

FIG. S7. *SUS* gene alignments for *Arabidopsis thaliana* and *Rorippa*.

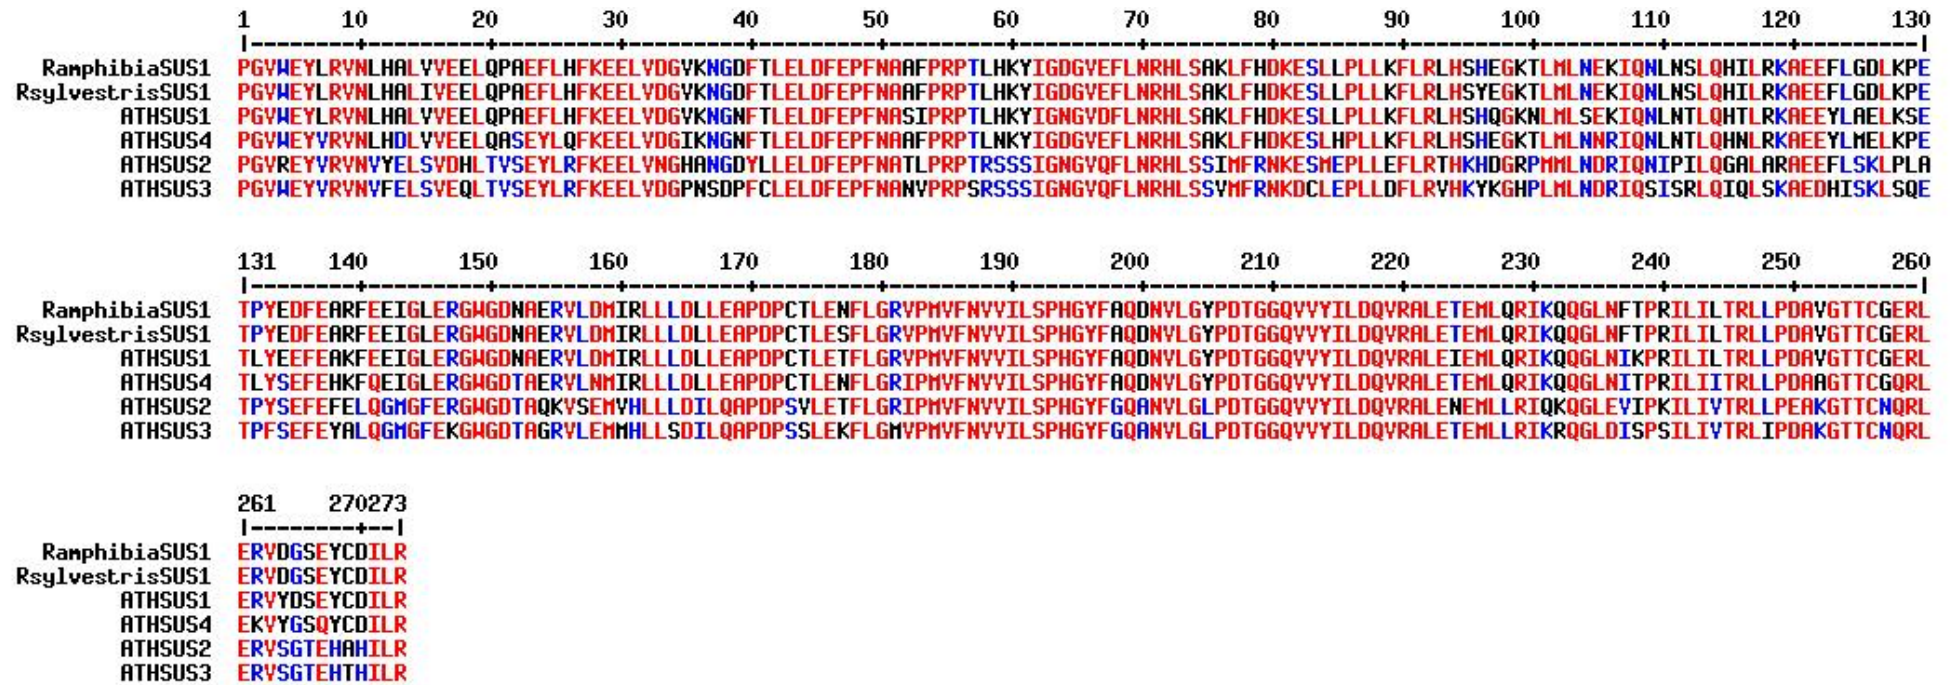

TABLE S1. ANOVA results for first submergence experiment

| Source                                         | Dependent variable | Type III sum of squares | Tests of between-subjects effects |                     |          |          |
|------------------------------------------------|--------------------|-------------------------|-----------------------------------|---------------------|----------|----------|
|                                                |                    |                         | d.f.                              | Mean square         | <i>F</i> | <i>P</i> |
| Species                                        | Stem elongation    | $8.806 \times 10^5$     | 2                                 | $4.403 \times 10^5$ | 247.817  | <0.001   |
|                                                | Below-ground d. wt | 1.171                   | 2                                 | 0.585               | 14.099   | <0.001   |
|                                                | Above-ground d. wt | 27.369                  | 2                                 | 13.685              | 142.637  | <0.001   |
| Treatment                                      | Stem elongation    | $2.013 \times 10^5$     | 1                                 | $2.013 \times 10^5$ | 113.280  | <0.001   |
|                                                | Below-ground d. wt | 12.629                  | 1                                 | 12.629              | 304.208  | <0.001   |
|                                                | Above-ground d. wt | 14.656                  | 1                                 | 14.656              | 152.757  | <0.001   |
| Time point                                     | Stem elongation    | $1.20 \times 10^6$      | 3                                 | $4.002 \times 10^5$ | 225.266  | <0.001   |
|                                                | Below-ground d. wt | 6.807                   | 3                                 | 2.269               | 54.653   | <0.001   |
|                                                | Above-ground d. wt | 3.018                   | 3                                 | 1.006               | 10.486   | <0.001   |
| Species $\times$ treatment                     | Stem elongation    | $1.012 \times 10^5$     | 2                                 | $5.062 \times 10^4$ | 28.492   | <0.001   |
|                                                | Below-ground d. wt | 0.145                   | 2                                 | 0.073               | 1.747    | 0.179    |
|                                                | Above-ground d. wt | 2.263                   | 2                                 | 1.132               | 11.796   | <0.001   |
| Species $\times$ Time point                    | Stem elongation    | $1.227 \times 10^5$     | 6                                 | $2.045 \times 10^4$ | 11.511   | <0.001   |
|                                                | Below-ground d. wt | 0.521                   | 6                                 | 0.087               | 2.093    | 0.060    |
|                                                | Above-ground d. wt | 2.093                   | 6                                 | 0.349               | 3.636    | 0.003    |
| Treatment $\times$ Time point                  | Stem elongation    | $7.224 \times 10^3$     | 2                                 | $3.612 \times 10^3$ | 2.033    | 0.136    |
|                                                | Below-ground d. wt | 1.145                   | 2                                 | 0.572               | 13.785   | <0.001   |
|                                                | Above-ground d. wt | 2.119                   | 2                                 | 1.06                | 11.045   | <0.001   |
| Species $\times$ Treatment $\times$ Time point | Stem elongation    | $5.059 \times 10^4$     | 4                                 | $1.265 \times 10^4$ | 7.118    | <0.001   |
|                                                | Below-ground d. wt | 0.161                   | 4                                 | 0.04                | 0.971    | 0.427    |
|                                                | Above-ground d. wt | 0.813                   | 4                                 | 0.203               | 2.117    | 0.084    |
| Error                                          | Stem elongation    | $1.812 \times 10^5$     | 102                               | $1.777 \times 10^3$ |          |          |
|                                                | Below-ground d. wt | 4.234                   | 102                               | 0.042               |          |          |
|                                                | Above-ground d. wt | 9.786                   | 102                               | 0.096               |          |          |



TABLE S2. ANOVA results for second submergence experiment

| Source                            | Dependent variable | Type III sum of squares | Tests of between-subjects effects |             |          |          |
|-----------------------------------|--------------------|-------------------------|-----------------------------------|-------------|----------|----------|
|                                   |                    |                         | d.f.                              | Mean square | <i>F</i> | <i>P</i> |
| Time point                        | Below-ground d. wt | 0.088                   | 2                                 | 0.044       | 1.140    | 0.323    |
|                                   | Above-ground d. wt | 5.478                   | 2                                 | 2.739       | 6.496    | 0.002    |
| Treatment                         | Below-ground d. wt | 0.411                   | 1                                 | 0.411       | 10.665   | 0.001    |
|                                   | Above-ground d. wt | 25.743                  | 1                                 | 25.743      | 61.057   | <0.001   |
| Genotype                          | Below-ground d. wt | 0.499                   | 2                                 | 0.249       | 6.475    | 0.002    |
|                                   | Above-ground d. wt | 52.362                  | 2                                 | 26.181      | 62.095   | <0.001   |
| Time point × Treatment            | Below-ground d. wt | 0.032                   | 1                                 | 0.032       | 0.824    | 0.366    |
|                                   | Above-ground d. wt | 3.656                   | 1                                 | 3.656       | 8.671    | 0.004    |
| Time point × Genotype             | Below-ground d. wt | 0.122                   | 4                                 | 0.030       | 0.790    | 0.533    |
|                                   | Above-ground d. wt | 5.273                   | 4                                 | 1.318       | 3.127    | 0.017    |
| Treatment × Genotype              | Below-ground d. wt | 0.078                   | 2                                 | 0.039       | 1.014    | 0.365    |
|                                   | Above-ground d. wt | 8.461                   | 2                                 | 4.230       | 10.033   | <0.001   |
| Time point × Treatment × Genotype | Below-ground d. wt | 0.238                   | 2                                 | 0.119       | 3.090    | 0.049    |
|                                   | Above-ground d. wt | 7.304                   | 2                                 | 3.652       | 8.662    | <0.001   |
| Error                             | Below-ground d. wt | 5.433                   | 141                               | 0.039       |          |          |
|                                   | Above-ground d. wt | 59.449                  | 141                               | 0.422       |          |          |

TABLE S3. ANOVA results for porosity measurements

|                | Sum of squares | d.f. | Mean square | <i>F</i> | <i>P</i> |
|----------------|----------------|------|-------------|----------|----------|
| Between groups | 214.393        | 2    | 107.196     | 83.498   | <0.001   |
| Within groups  | 14.122         | 11   | 1.284       |          |          |
| Total          | 228.515        | 13   |             |          |          |

TABLE S4. LSD *post hoc* test results for porosity measurements

| <i>(I)</i> spp       | <i>(J)</i> spp       | Mean difference<br><i>(I - J)</i> | s.e.        | <i>P</i> | 95% confidence interval |             |
|----------------------|----------------------|-----------------------------------|-------------|----------|-------------------------|-------------|
|                      |                      |                                   |             |          | Lower bound             | Upper bound |
| <i>R. amphibia</i>   | Hybrid               | 4.25                              | 0.760078665 | 0.000    | 2.58                    | 5.92        |
|                      | <i>R. sylvestris</i> | 9.25                              | 0.716609038 | 0.000    | 7.67                    | 10.8        |
| Hybrid               | <i>R. amphibia</i>   | -4.25                             | 0.760078665 | 0.000    | -5.92                   | -2.58       |
|                      | <i>R. sylvestris</i> | 5.00                              | 0.760078665 | 0.000    | 3.33                    | 6.67        |
| <i>R. sylvestris</i> | <i>R. amphibia</i>   | -9.25                             | 0.716609038 | 0.000    | -10.8                   | -7.67       |
|                      | Hybrid               | -5.00                             | 0.760078665 | 0.000    | -6.67                   | -3.33       |
